# Supplementary material for: The HLA diversity of the Anthony Nolan register
Source: PubMed Central journal article supplement (PMC7756289; doi:10.1111/tan.14127), 2020-11-16
Supplement: TAN-97-15-s001.pdf [file TAN-97-15-s001.pdf]

S 1: Mapping between broad ethnic group used in this analysis, to ethnic categories from UK 2011 Census data, England and Wales (Table KS201EW), Scotland (Table KS201SC), Northern Ireland (Table KS201NI) and ethnic groups on the AN register

| Ethnic group   | Ethnicities on AN register                                            | England/Wales category                                                                                                          | Scotland category                                                                                                                                                                                                                  | Northern Ireland category                   |
|----------------|-----------------------------------------------------------------------|---------------------------------------------------------------------------------------------------------------------------------|------------------------------------------------------------------------------------------------------------------------------------------------------------------------------------------------------------------------------------|---------------------------------------------|
| Asian          | Asian, Pakistan, India, Bangladesh, Other South Asian, Southern Asian | Asian/Asian British: Other Asian, Asian/Asian British: Bangladeshi, Asian/Asian British: Indian, Asian/Asian British: Pakistani | Asian, Asian Scottish or Asian British: Other Asian, Asian, Asian Scottish or Asian British: Indian, Indian Scottish or Indian British, Asian, Asian Scottish or Asian British: Pakistani, Pakistani Scottish or Pakistani British | Other Asian, Bangladeshi, Indian, Pakistani |
| BINWE          | British/Irish, N European, Other Northern European                    | White: English/Welsh/Scottish/Northern Irish/British, White: Irish, White: Gypsy or Irish Traveller                             | White: Scottish, White: Other British, White: Irish, White: Gypsy/Traveller                                                                                                                                                        | White, Irish Traveller                      |
| Bangladesh     | Bangladesh                                                            | Asian/Asian British: Bangladeshi                                                                                                | Asian, Asian Scottish or Asian British: Bangladeshi, Bangladeshi Scottish or Bangladeshi British                                                                                                                                   | Bangladeshi                                 |
| African        | African                                                               | Black/African/Caribbean/Black British: African                                                                                  | African                                                                                                                                                                                                                            | African                                     |
| Caribbean      | African-Caribbean                                                     | Black/African/Caribbean/Black British: Caribbean                                                                                | Caribbean or Black: Caribbean, Caribbean Scottish or Caribbean British                                                                                                                                                             | Caribbean                                   |
| India          | India                                                                 | Asian/Asian British: Indian                                                                                                     | Asian, Asian Scottish or Asian British: Indian, Indian Scottish or Indian British                                                                                                                                                  | Indian                                      |
| Middle Eastern | Middle Eastern                                                        | Other ethnic group: Arab                                                                                                        | Other ethnic groups: Arab, Arab Scottish or Arab British                                                                                                                                                                           |                                             |
| East Asian     | Oriental, East Asian, Southeast Asia                                  | Asian/Asian British: Chinese                                                                                                    | Asian, Asian Scottish or Asian British: Chinese, Chinese Scottish or Chinese British                                                                                                                                               | Chinese                                     |
| Pakistan       | Pakistan                                                              | Asian/Asian British: Pakistani                                                                                                  | Asian, Asian Scottish or Asian British: Pakistani, Pakistani Scottish or Pakistani British                                                                                                                                         | Pakistani                                   |
