# Supplementary material for: The HLA diversity of the Anthony Nolan register
Source: PubMed Central journal article supplement (PMC7756289; doi:10.1111/tan.14127), 2020-11-16
Supplement: TAN-97-15-s002.pdf [file TAN-97-15-s002.pdf]

S 2: Breakdown of HLA typing data by ethnicity

| Ethnicity  | Typed at |   |   |      |      | Number of individuals |              |       |
|------------|----------|---|---|------|------|-----------------------|--------------|-------|
|            | A        | C | B | DRB1 | DQB1 | Count                 | Fraction (%) |       |
| BINWE      | X        | X | X | X    | X    | 299703                | 50.00        |       |
|            | X        | X | X | X    |      | 138725                | 23.14        |       |
|            | X        | X | X |      | X    | 264                   | 0.04         |       |
|            | X        | X | X |      |      | 194                   | 0.03         |       |
|            | X        |   | X | X    | X    | 17968                 | 3.00         |       |
|            | X        |   | X | X    |      | 120618                | 20.12        |       |
|            | X        |   | X |      | X    | 9                     | 0.00         |       |
|            | X        |   | X |      |      | 21929                 | 3.66         |       |
|            | Asian    | X | X | X    | X    | X                     | 22451        | 59.86 |
|            |          | X | X | X    | X    |                       | 8603         | 22.94 |
| X          |          | X | X |      | X    | 46                    | 0.12         |       |
| X          |          | X | X |      |      | 24                    | 0.06         |       |
| X          |          |   | X | X    | X    | 328                   | 0.87         |       |
| X          |          |   | X | X    |      | 5582                  | 14.88        |       |
| X          |          |   | X |      | X    | 7                     | 0.02         |       |
| X          |          |   | X |      |      | 464                   | 1.24         |       |
| India      |          | X | X | X    | X    | X                     | 10352        | 97.69 |
|            |          | X | X | X    | X    |                       | 202          | 1.91  |
|            | X        | X | X |      | X    | 16                    | 0.15         |       |
|            | X        | X | X |      |      | 3                     | 0.03         |       |
|            | X        |   | X | X    | X    | 8                     | 0.08         |       |
|            | X        |   | X | X    |      | 12                    | 0.11         |       |
|            | X        |   | X |      | X    | 3                     | 0.03         |       |
|            | X        |   | X |      |      | 1                     | 0.01         |       |
|            | Pakistan | X | X | X    | X    | X                     | 3197         | 95.35 |
|            |          | X | X | X    | X    |                       | 129          | 3.85  |
| X          |          | X | X |      | X    | 7                     | 0.21         |       |
| X          |          | X | X |      |      | 2                     | 0.06         |       |
| X          |          |   | X | X    | X    | 10                    | 0.30         |       |
| X          |          |   | X | X    |      | 8                     | 0.24         |       |
| Bangladesh | X        | X | X | X    | X    | 1082                  | 97.92        |       |
|            | X        | X | X | X    |      | 15                    | 1.36         |       |
|            | X        | X | X |      | X    | 2                     | 0.18         |       |
|            | X        |   | X | X    | X    | 2                     | 0.18         |       |
|            | X        |   | X | X    |      | 4                     | 0.36         |       |
| African    | X        | X | X | X    | X    | 880                   | 15.28        |       |
|            | X        | X | X | X    |      | 3176                  | 55.13        |       |
|            | X        | X | X |      | X    | 4                     | 0.07         |       |
|            | X        | X | X |      |      | 4                     | 0.07         |       |
|            | X        |   | X | X    | X    | 50                    | 0.87         |       |
|            | X        |   | X | X    |      | 1289                  | 22.37        |       |
|            | X        |   | X |      |      | 358                   | 6.21         |       |
| Caribbean  | X        | X | X | X    | X    | 8399                  | 43.72        |       |
|            | X        | X | X | X    |      | 4341                  | 22.59        |       |

(continued)

| Ethnicity      | A | C | B | DRB1 | DQB1 | Count | Fraction (%) |
|----------------|---|---|---|------|------|-------|--------------|
|                | X | X | X |      | X    | 29    | 0.15         |
|                | X | X | X |      |      | 9     | 0.05         |
|                | X |   | X | X    | X    | 477   | 2.48         |
|                | X |   | X | X    |      | 3863  | 20.11        |
|                | X |   | X |      | X    | 1     | 0.01         |
|                | X |   | X |      |      | 2094  | 10.90        |
| Jewish         | X | X | X | X    | X    | 3517  | 35.23        |
|                | X | X | X | X    |      | 1640  | 16.43        |
|                | X | X | X |      | X    | 6     | 0.06         |
|                | X | X | X |      |      | 3     | 0.03         |
|                | X |   | X | X    | X    | 320   | 3.21         |
|                | X |   | X | X    |      | 3957  | 39.63        |
|                | X |   | X |      | X    | 3     | 0.03         |
|                | X |   | X |      |      | 538   | 5.39         |
| East Asian     | X | X | X | X    | X    | 2889  | 67.47        |
|                | X | X | X | X    |      | 870   | 20.32        |
|                | X | X | X |      | X    | 7     | 0.16         |
|                | X | X | X |      |      | 5     | 0.12         |
|                | X |   | X | X    | X    | 39    | 0.91         |
|                | X |   | X | X    |      | 394   | 9.20         |
|                | X |   | X |      |      | 78    | 1.82         |
| Middle Eastern | X | X | X | X    | X    | 651   | 44.93        |
|                | X | X | X | X    |      | 594   | 40.99        |
|                | X |   | X | X    | X    | 2     | 0.14         |
|                | X |   | X | X    |      | 192   | 13.25        |
|                | X |   | X |      |      | 10    | 0.69         |
