# Supplementary material for: The HLA diversity of the Anthony Nolan register
Source: PubMed Central journal article supplement (PMC7756289; doi:10.1111/tan.14127), 2020-11-16
Supplement: TAN-97-15-s003.pdf [file TAN-97-15-s003.pdf]

S 3: Nei's pairwise genetic distance matrix between subpopulations of the AN register

|                | African | Asian | Bangladesh | BINWE | Caribbean | India | Jewish | Middle Eastern | East Asian | Pakistan |
|----------------|---------|-------|------------|-------|-----------|-------|--------|----------------|------------|----------|
| African        | 0.00    | 3.63  | 4.58       | 2.31  | 0.23      | 3.76  | 3.40   | 2.65           | 3.78       | 3.76     |
| Asian          | 3.63    | 0.00  | 0.43       | 2.08  | 2.47      | 0.02  | 2.11   | 1.12           | 1.01       | 0.10     |
| Bangladesh     | 4.58    | 0.43  | 0.00       | 2.91  | 2.84      | 0.54  | 3.05   | 2.35           | 1.07       | 0.87     |
| BINWE          | 2.31    | 2.08  | 2.91       | 0.00  | 1.24      | 2.25  | 1.28   | 1.08           | 2.77       | 2.30     |
| Caribbean      | 0.23    | 2.47  | 2.84       | 1.24  | 0.00      | 2.56  | 2.41   | 1.91           | 2.96       | 2.70     |
| India          | 3.76    | 0.02  | 0.54       | 2.25  | 2.56      | 0.00  | 2.17   | 1.15           | 1.14       | 0.11     |
| Jewish         | 3.40    | 2.11  | 3.05       | 1.28  | 2.41      | 2.17  | 0.00   | 0.99           | 2.97       | 2.19     |
| Middle Eastern | 2.65    | 1.12  | 2.35       | 1.08  | 1.91      | 1.15  | 0.99   | 0.00           | 2.06       | 1.09     |
| East Asian     | 3.78    | 1.01  | 1.07       | 2.77  | 2.96      | 1.14  | 2.97   | 2.06           | 0.00       | 1.28     |
| Pakistan       | 3.76    | 0.10  | 0.87       | 2.30  | 2.70      | 0.11  | 2.19   | 1.09           | 1.28       | 0.00     |
